# Supplementary material for: Comparative analysis of prophages in Streptococcus mutans genomes
Source: PeerJ journal article supplement (doi:10.7717/peerj.4057), 2017-11-17

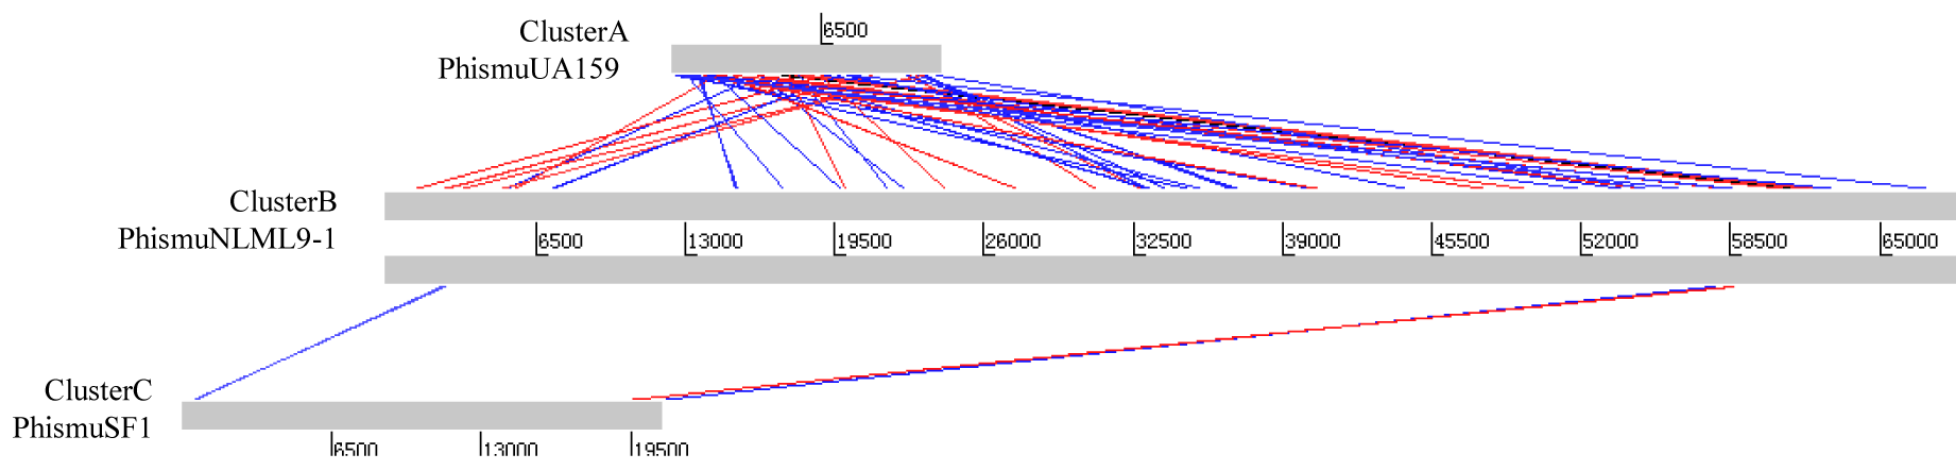

Supplement: Figure_S1.pdf [file Figure_S1.pdf]
